# Supplementary material for: Gene-specific patterns of expression variation across organs and species
Source: PubMed Central journal article supplement (PMC4937605; doi:10.1186/s13059-016-1008-y), 2016-07-08
Supplement: 13059_2016_1008_MOESM2_ESM.pdf [file 13059_2016_1008_MOESM2_ESM.pdf]

**Table S1. Intersection between gene sets identified by variance decomposition and dynamic range.**

|                      | <b>TVGs</b> | <b>SVGs</b> | <b>Others</b> | <b>Total</b> |
|----------------------|-------------|-------------|---------------|--------------|
| <b>Constrained</b>   | 283         | 551         | 1,827         | 2,661        |
| <b>Unconstrained</b> | 1,245       | 268         | 2,109         | 3,622        |
| <b>Total</b>         | 1,528       | 819         | 3,936         | 6,283        |
